# Supplementary material for: Fabrication of biomimetic patterns for high transmission and antifogging property
Source: Royal Society of Chemistry journal article supplement (doi:10.1039/c5ra02917a), 2015-01-01
Supplement: c5ra02917a1.pdf [file c5ra02917a1.pdf]

## Supporting Information

### **Fabrication of Biomimetic Patterns for High Transmission and Antifogging Property**

Hongbo Xu, Lingxiao Liu, Feifei Wu, Daren Xu, Nan Lu\*

State Key Laboratory of Supramolecular Structure and Materials, College of Chemistry, Jilin University, Changchun 130012, P. R. China

Corresponding author. Tel: (+86)-431-85168477. Fax: (+86)-431-85168477. E-mail address: luenan@jlu.edu.cn

Table 1. Structural elucidation of Ag nanoparticles obtained by thermal dewetting

| Thickness of Ag(nm) | size of particles(nm) | spacing of particle(nm) |
|---------------------|-----------------------|-------------------------|
| 7                   | $36 \pm 10$           | $25 \pm 15$             |
| 13                  | $75 \pm 16$           | $70 \pm 20$             |
| 20                  | $140 \pm 28$          | $120 \pm 40$            |

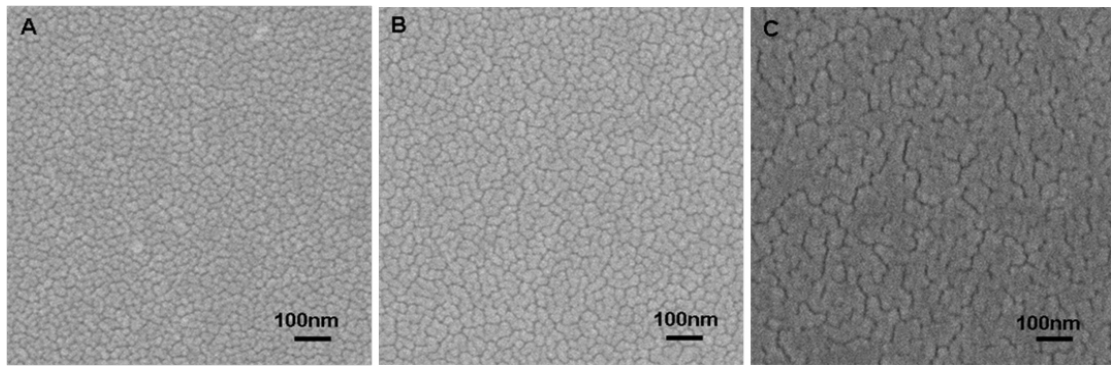

Figure S1. SEM images of the Ag films of different thicknesses, (A) 7 nm, (B) 13 nm, (C) 20 nm.

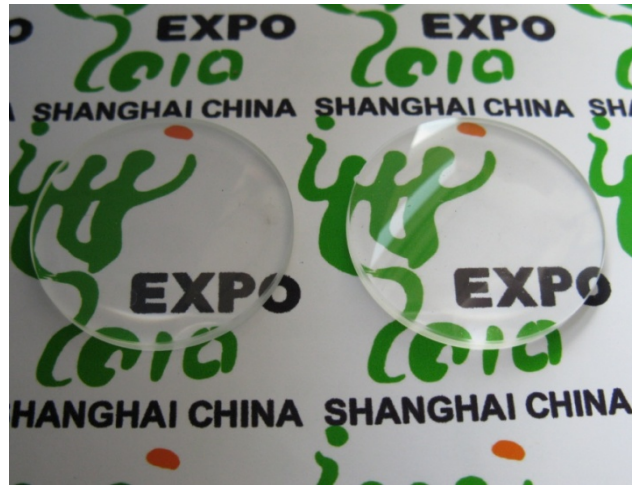

Figure S2. Photographs of the dual-sided structured lens (left) and planconvex lens (right).
